# Supplementary material for: LiBa12(BO3)7F4 (LBBF) crystals doped with Eu3+, Tb3+, Ce3+: structure and luminescence properties
Source: Royal Society of Chemistry journal article supplement (doi:10.1039/d3dt01279d), 2023-01-01
Supplement: d3dt01279d1.pdf [file d3dt01279d1.pdf]

## Electronic Supplementary Information

### **LiBa<sub>12</sub>(BO<sub>3</sub>)<sub>7</sub>F<sub>4</sub> (LBBF) crystals doped with Eu<sup>3+</sup>, Tb<sup>3+</sup>, Ce<sup>3+</sup>: structure and luminescence properties**

Tatyana B. Bekker<sup>a,b\*</sup>, Alexey A. Ryadun<sup>b,c</sup>, Alexey V. Davydov<sup>a,b</sup>, Sergey V. Rashchenko<sup>a,b</sup>

<sup>a</sup>Sobolev Institute of Geology and Mineralogy, Siberian Branch of the Russian Academy of Sciences, 630090 Novosibirsk, Russia

<sup>b</sup>Novosibirsk State University, 630090 Novosibirsk, Russia

<sup>c</sup>Nikolaev Institute of Inorganic Chemistry, Siberian Branch of the Russian Academy of Sciences, 630090 Novosibirsk, Russia

## Contents

**Table S1** Details of data collection and structure refinement for  $\text{LiBa}_{12}(\text{BO}_3)_7\text{F}_4: \text{Eu}^{3+}$  crystal

**Fig. S1** Transmission spectra of 1.2 mm thick plates made of LBBF:  $\text{Eu}^{3+}$ ,  $\text{Tb}^{3+}$  and LBBF:  $\text{Eu}^{3+}$ ,  $\text{Tb}^{3+}$ ,  $\text{Ce}^{3+}$  crystals.

**Fig. S2** Rietveld refinement of the X-ray diffraction patterns of solid state synthesized LBBF and LBBF:  $\text{Ce}^{3+}$  samples.

**Table S2** The results of whole-profile fitting of X-ray diffraction patterns of LBBF:  $\text{Tb}^{3+}$  samples

**Fig. S3** Rietveld refinement of the X-ray diffraction patterns of solid state synthesized LBBF and LBBF:  $\text{Tb}^{3+}$  samples.

**Table S3** The results of whole-profile fitting of X-ray diffraction patterns of LBBF:  $\text{Eu}^{3+}$  samples

**Fig. S4** Rietveld refinement of the X-ray diffraction patterns of solid state synthesized LBBF and LBBF:  $\text{Eu}^{3+}$  samples.

**Fig. S5** Excitation light profiles and PL spectra obtained under 395 nm excitation by setting quartz cells with and without the sample: LBBF: 0.5 wt%  $\text{Eu}^{3+}$  (a), LBBF: 2 wt%  $\text{Eu}^{3+}$  (b).

**Table S1** Details of data collection and structure refinement for  $\text{LiBa}_{12}(\text{BO}_3)_7\text{F}_4: \text{Eu}^{3+}$  crystal

| <b>Crystal data</b>                                                        |                                                                                                                                                                                                |
|----------------------------------------------------------------------------|------------------------------------------------------------------------------------------------------------------------------------------------------------------------------------------------|
| Chemical formula                                                           | $\text{B}_7\text{Ba}_{11.72563}\text{F}_4\text{LiO}_{21}$                                                                                                                                      |
| $M_r$                                                                      | 2105                                                                                                                                                                                           |
| Crystal system, space group                                                | Tetragonal, $P4_2/mbc$                                                                                                                                                                         |
| Temperature (K)                                                            | 293                                                                                                                                                                                            |
| $a, c$ (Å)                                                                 | 13.5360 (2), 14.9439 (2)                                                                                                                                                                       |
| $V$ (Å <sup>3</sup> )                                                      | 2738.07 (7)                                                                                                                                                                                    |
| $Z$                                                                        | 4                                                                                                                                                                                              |
| Radiation type                                                             | Mo $K\alpha$                                                                                                                                                                                   |
| $\mu$ (mm <sup>-1</sup> )                                                  | 16.67                                                                                                                                                                                          |
| Crystal size (mm)                                                          | $0.25 \times 0.15 \times 0.05$                                                                                                                                                                 |
| Data collection                                                            |                                                                                                                                                                                                |
| Diffraction                                                                | Esperanto- <i>CrysAlis PRO</i> -abstract goniometer imported esperanto images                                                                                                                  |
| Absorption correction                                                      | Multi-scan<br><i>CrysAlis PRO</i> 1.171.42.49 (Rigaku Oxford Diffraction, 2022)<br>Empirical absorption correction using spherical harmonics, implemented in SCALE3 ABSPACK scaling algorithm. |
| $T_{\min}, T_{\max}$                                                       | 0.182, 1                                                                                                                                                                                       |
| No. of measured, independent and observed [ $I > 3\sigma(I)$ ] reflections | 103417, 1987, 1253                                                                                                                                                                             |
| $R_{\text{int}}$                                                           | 0.075                                                                                                                                                                                          |
| $(\sin \theta/\lambda)_{\text{max}}$ (Å <sup>-1</sup> )                    | 0.694                                                                                                                                                                                          |
| Refinement                                                                 |                                                                                                                                                                                                |
| $R[F^2 > 2\sigma(F^2)], wR(F^2), S$                                        | 0.020, 0.069, 0.65                                                                                                                                                                             |
| No. of reflections                                                         | 1987                                                                                                                                                                                           |
| No. of parameters                                                          | 125                                                                                                                                                                                            |
| $\Delta\rho_{\text{max}}, \Delta\rho_{\text{min}}$ (e Å <sup>-3</sup> )    | 1.37, -0.97                                                                                                                                                                                    |

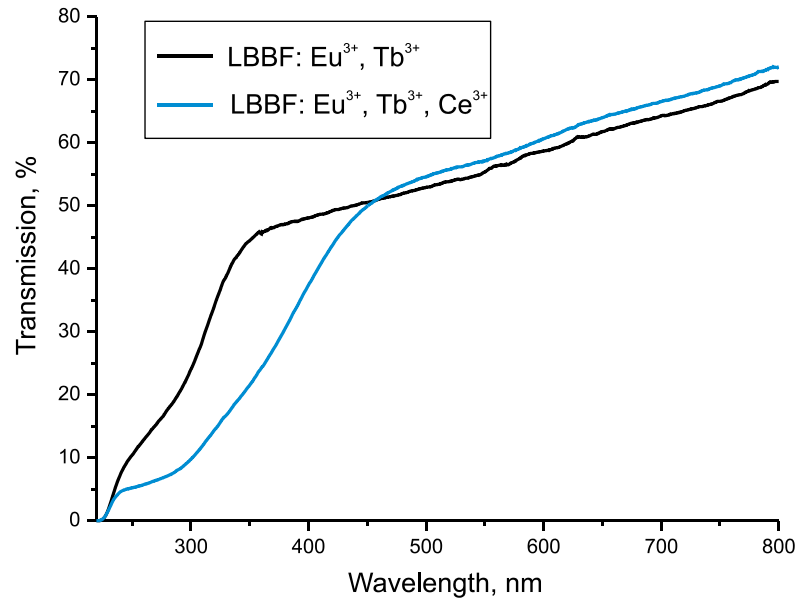

**Fig. S1** Transmission spectra of 1.2 mm thick plates made of LBBF: Eu<sup>3+</sup>, Tb<sup>3+</sup> and LBBF: Eu<sup>3+</sup>, Tb<sup>3+</sup>, Ce<sup>3+</sup> crystals.

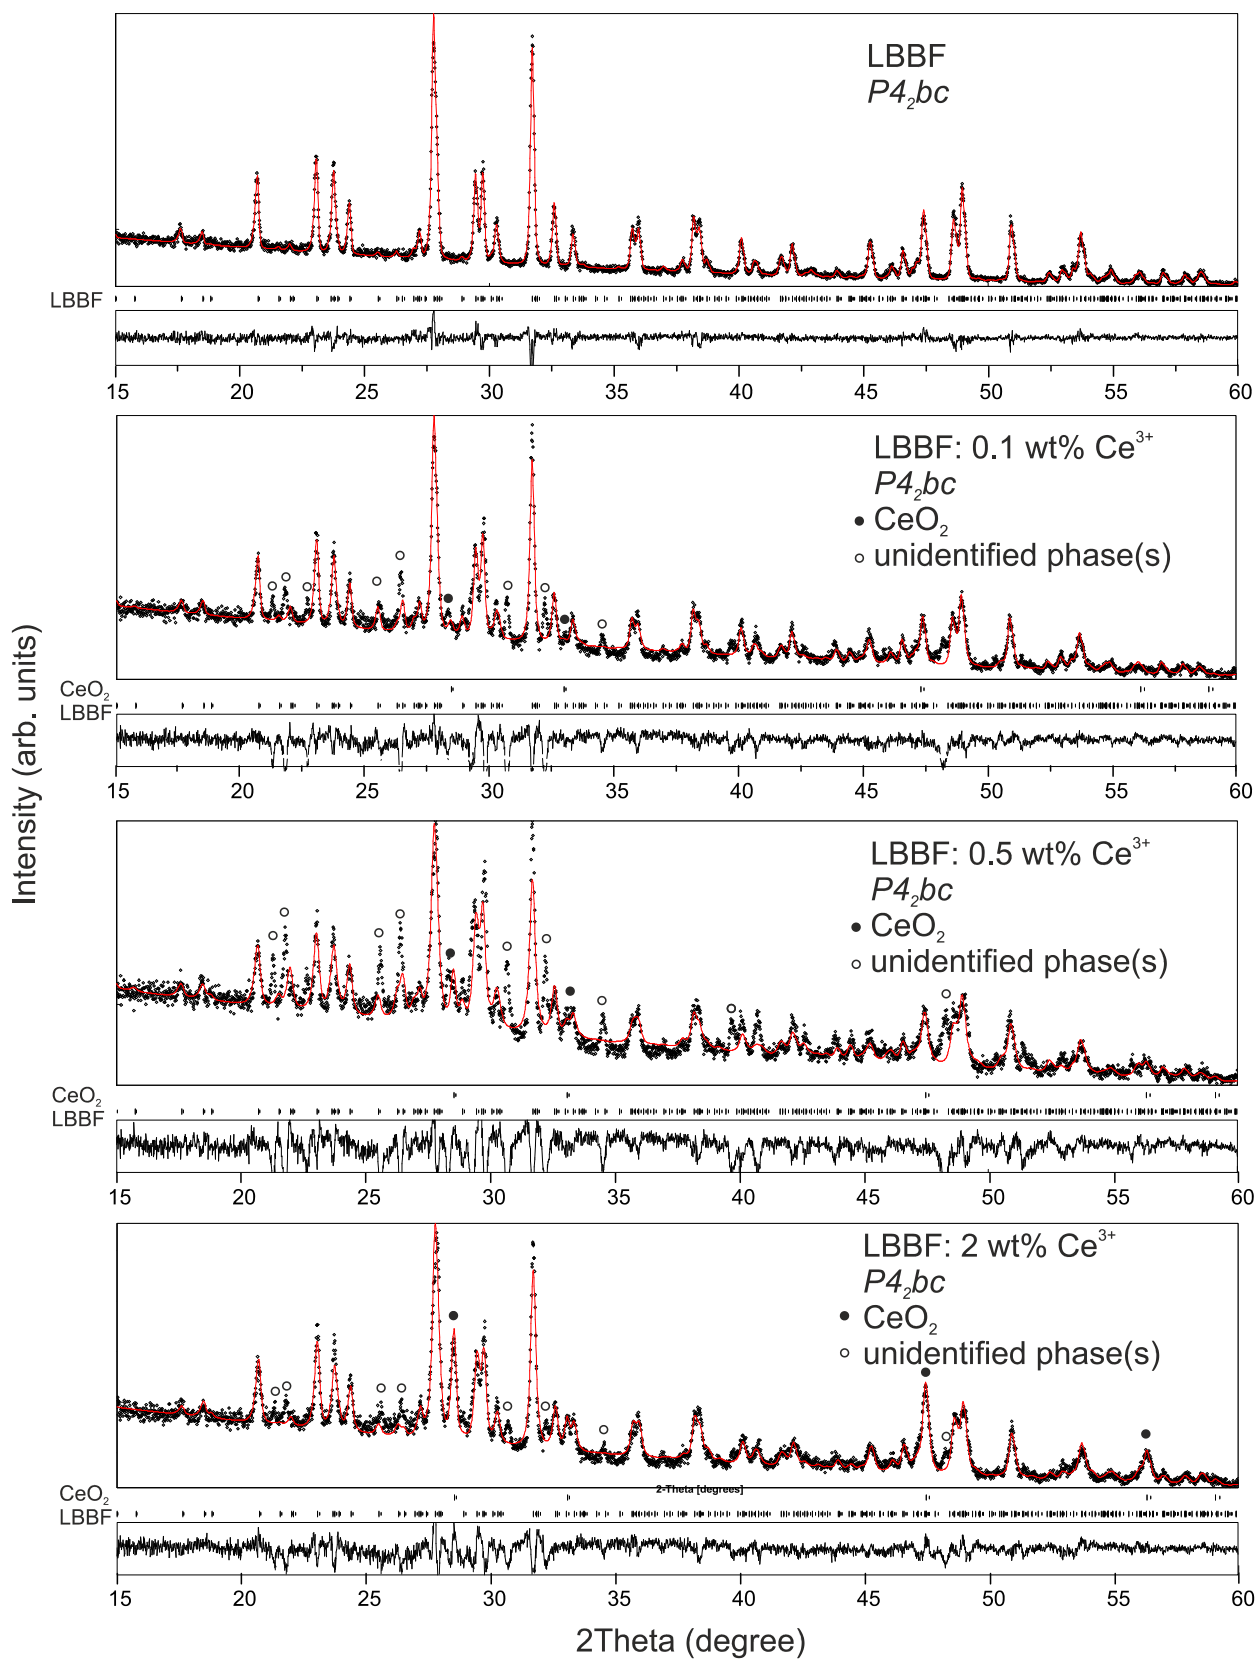

**Fig. S2** Rietveld refinement of the X-ray diffraction patterns of solid state synthesized LBBF and LBBF:  $Ce^{3+}$  samples.

**Table S2** The results of whole-profile fitting of X-ray diffraction patterns of LBBF: Tb<sup>3+</sup> samples

| Phase<br>synthesized by solid-<br>state synthesis | Space group<br>used for<br>refinement | Unit cell parameters, Å |            |            | V, Å <sup>3</sup> | <i>R<sub>b</sub></i> <sup>*</sup> , % |
|---------------------------------------------------|---------------------------------------|-------------------------|------------|------------|-------------------|---------------------------------------|
|                                                   |                                       | <i>a</i>                | <i>b</i>   | <i>c</i>   |                   |                                       |
| LBBF                                              | <i>P4<sub>2</sub>bc</i>               | 13.5464(6)              | –          | 14.9599(8) | 2745.2(2)         | 6.052                                 |
| LBBF: 0.4 wt% Tb <sup>3+</sup>                    | <i>Pbam</i>                           | 13.418(1)               | 13.6523(1) | 14.951(1)  | 2738.9(3)         | 5.746                                 |
| LBBF: 0.75 wt% Tb <sup>3+</sup>                   | <i>Pbam</i>                           | 13.3919(9)              | 13.688(1)  | 14.961(1)  | 2741.5(3)         | 5.854                                 |
| LBBF: 1 wt% Tb <sup>3+</sup>                      | <i>Pbam</i>                           | 13.407(1)               | 13.669(1)  | 14.956(1)  | 2741.1(3)         | 6.945                                 |

*R<sub>b</sub>*<sup>\*</sup> – R-Bragg value for the whole refinement.

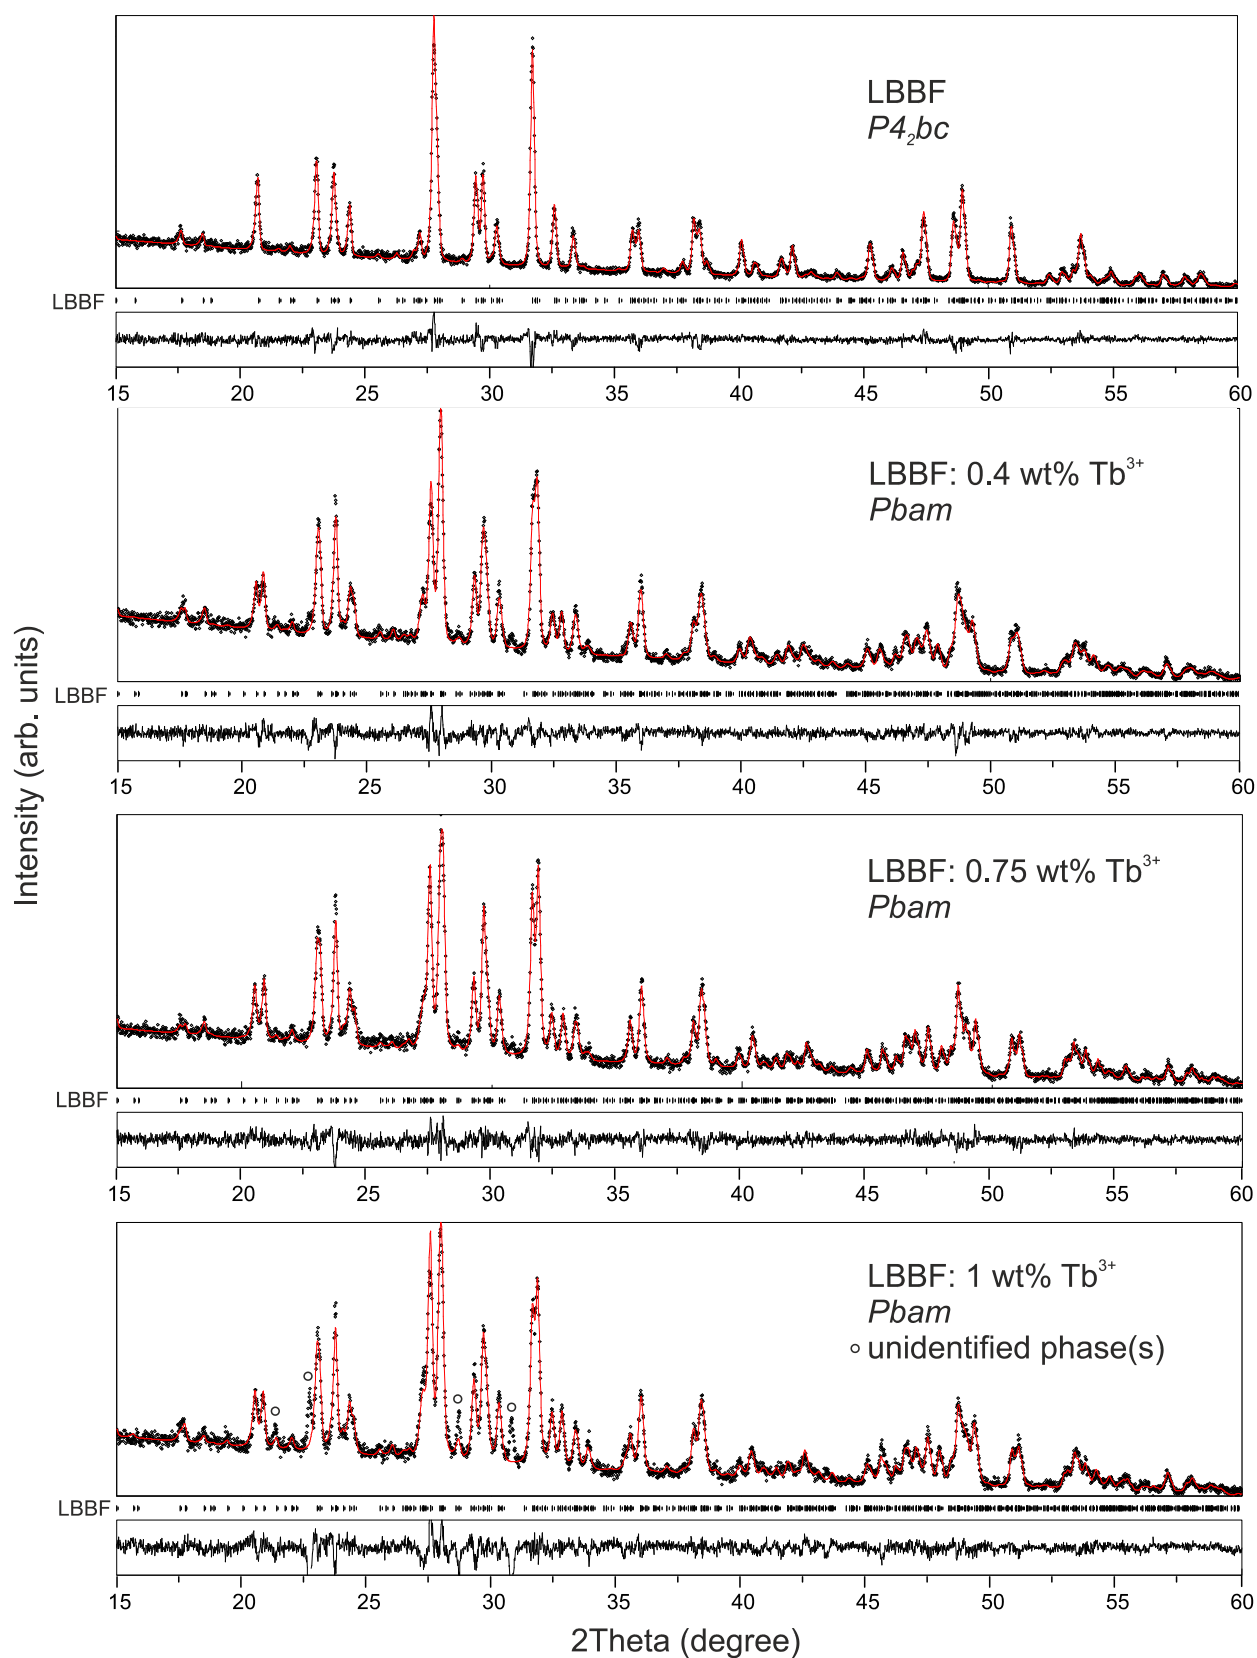

**Fig. S3** Rietveld refinement of the X-ray diffraction patterns of solid state synthesized LBBF and LBBF:  $Tb^{3+}$  samples.

**Table S3** The results of whole-profile fitting of X-ray diffraction patterns of LBBF: Eu<sup>3+</sup> samples

| Phase synthesized by solid-state synthesis | Space group used for refinement | Unit cell parameters, Å |           |            | V, Å <sup>3</sup> | <i>R<sub>b</sub></i> <sup>*</sup> , % |
|--------------------------------------------|---------------------------------|-------------------------|-----------|------------|-------------------|---------------------------------------|
|                                            |                                 | <i>a</i>                | <i>b</i>  | <i>c</i>   |                   |                                       |
| LBBF                                       | <i>P4<sub>2</sub>bc</i>         | 13.5464(6)              | –         | 14.9599(8) | 2745.2(2)         | 6.052                                 |
| LBBF: 0.1 wt% Eu <sup>3+</sup>             | <i>Pbam</i>                     | 13.462(1)               | 13.638(1) | 14.974(1)  | 2749.3(3)         | 6.002                                 |
| LBBF: 0.5 wt% Eu <sup>3+</sup>             | <i>Pbam</i>                     | 13.421(1)               | 13.668(1) | 14.958(1)  | 2744.1(3)         | 5.899                                 |
| LBBF: 2 wt% Eu <sup>3+</sup>               | <i>Pbam</i>                     | 13.450(1)               | 13.634(1) | 14.957(2)  | 2742.8(3)         | 6.144                                 |
| LBBF: 4 wt% Eu <sup>3+</sup>               | <i>P4<sub>2</sub>bc</i>         | 13.5393(8)              | –         | 14.950(1)  | 2740.5(3)         | 7.567                                 |
|                                            | <i>Pbam</i>                     | 13.54(1)                | 13.53(1)  | 14.951(1)  | 2740(3)           | 9.947                                 |
| LBBF: 5 wt% Eu <sup>3+</sup>               | <i>P4<sub>2</sub>bc</i>         | 13.5396(8)              | –         | 14.947(1)  | 2740.0(3)         | 7.832                                 |
|                                            | <i>Pbam</i>                     | 13.540(6)               | 13.539(7) | 14.951(1)  | 2741(1)           | 9.111                                 |
| LBBF: 6 wt% Eu <sup>3+</sup>               | <i>P4<sub>2</sub>/mbc</i>       | 13.5398(8)              | –         | 14.948(1)  | 2740.4(3)         | 7.831                                 |
|                                            | <i>Pbam</i>                     | 13.540(7)               | 13.540(7) | 14.951(1)  | 2741(2)           | 9.233                                 |

*R<sub>b</sub>*<sup>\*</sup> – R-Bragg value for the whole refinement.



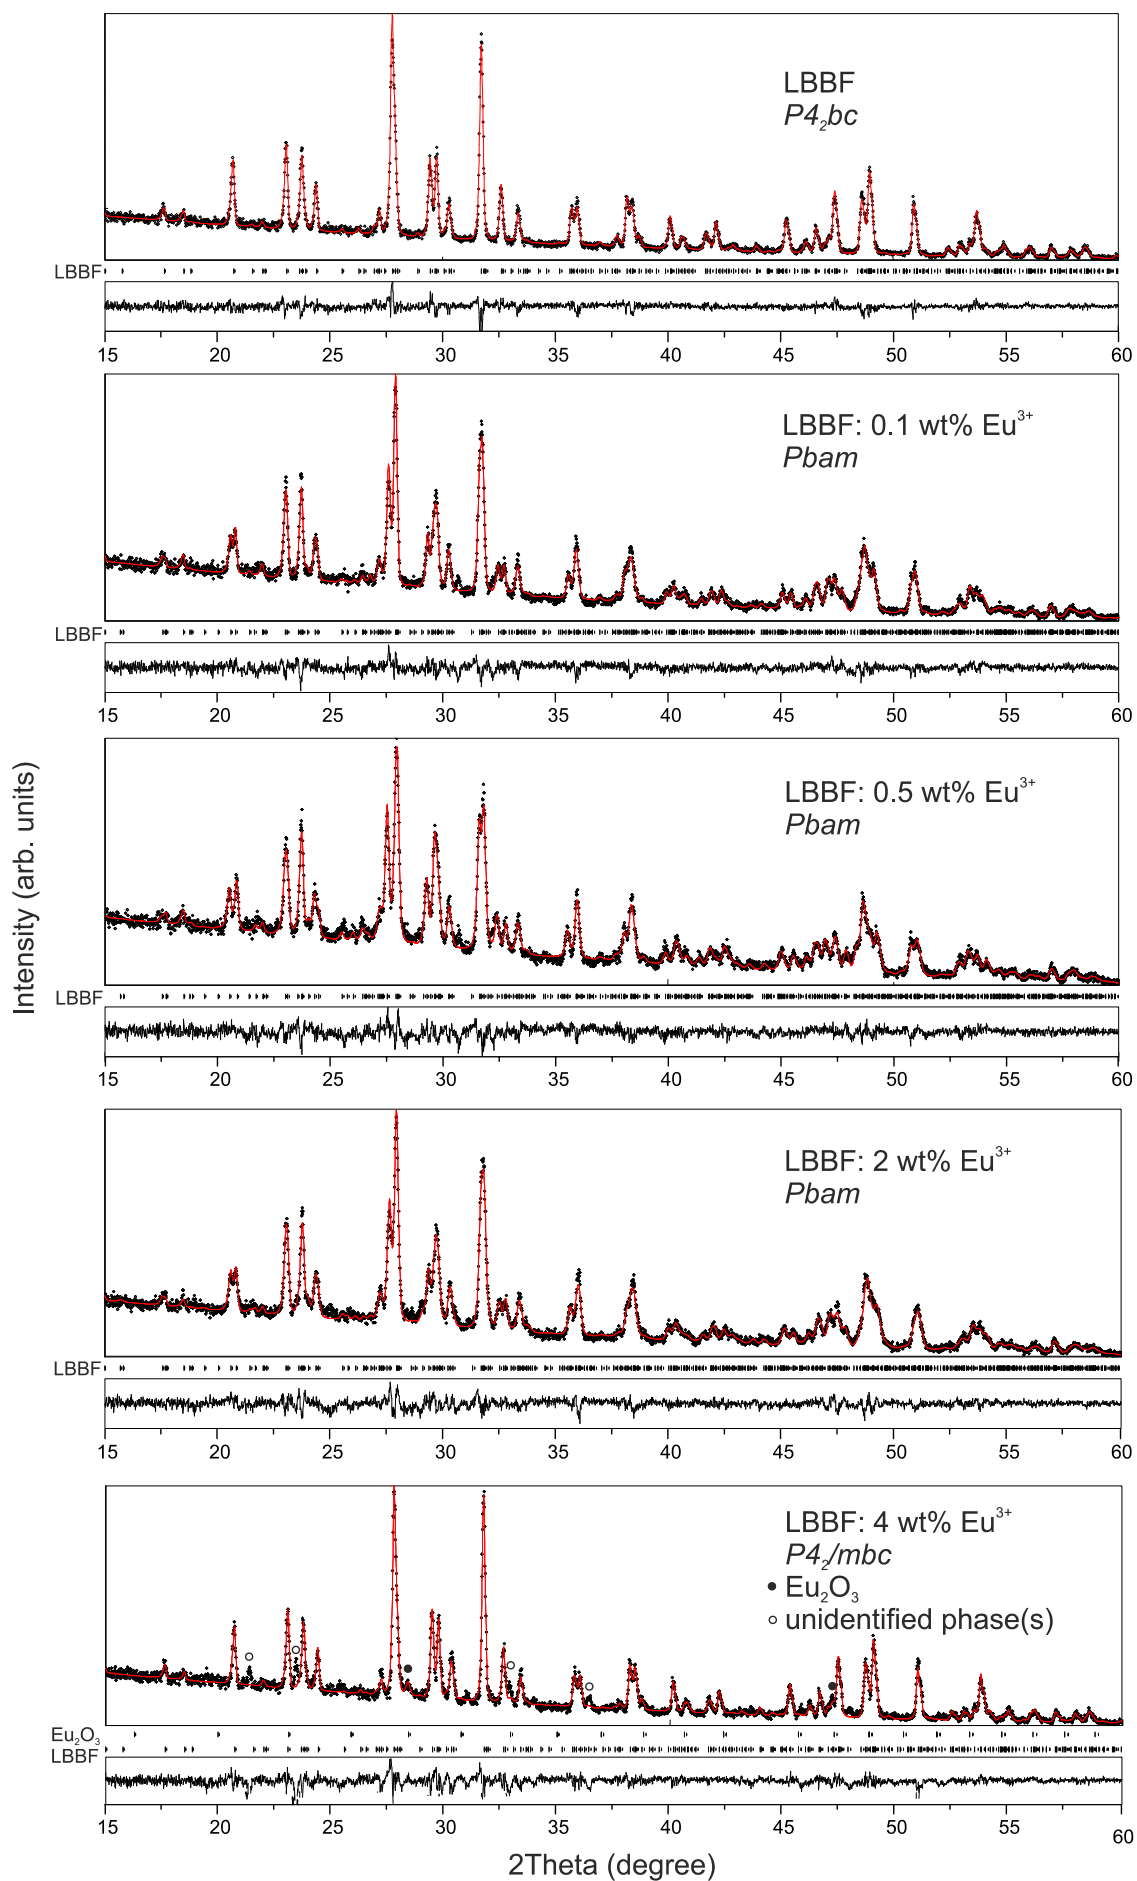

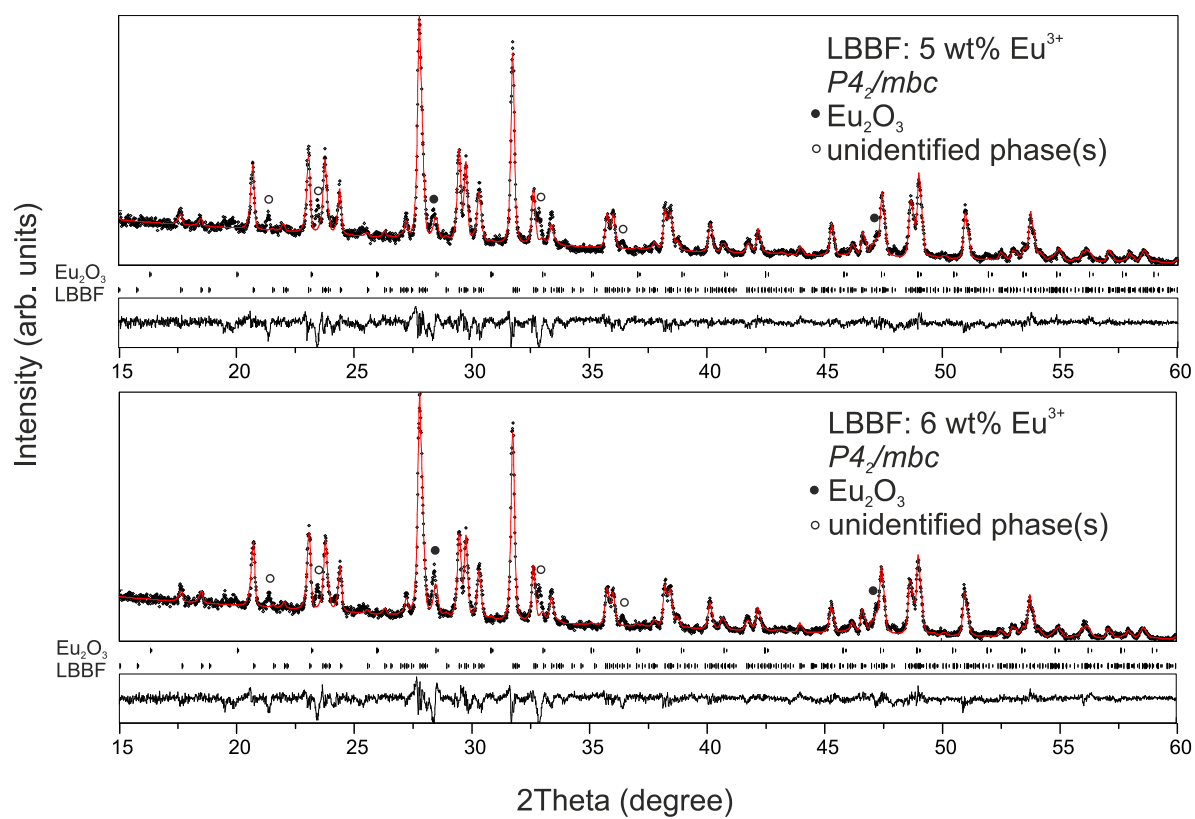

**Fig. S4** Rietveld refinement of the X-ray diffraction patterns of solid state synthesized LBBF and LBBF:  $\text{Eu}^{3+}$  samples.

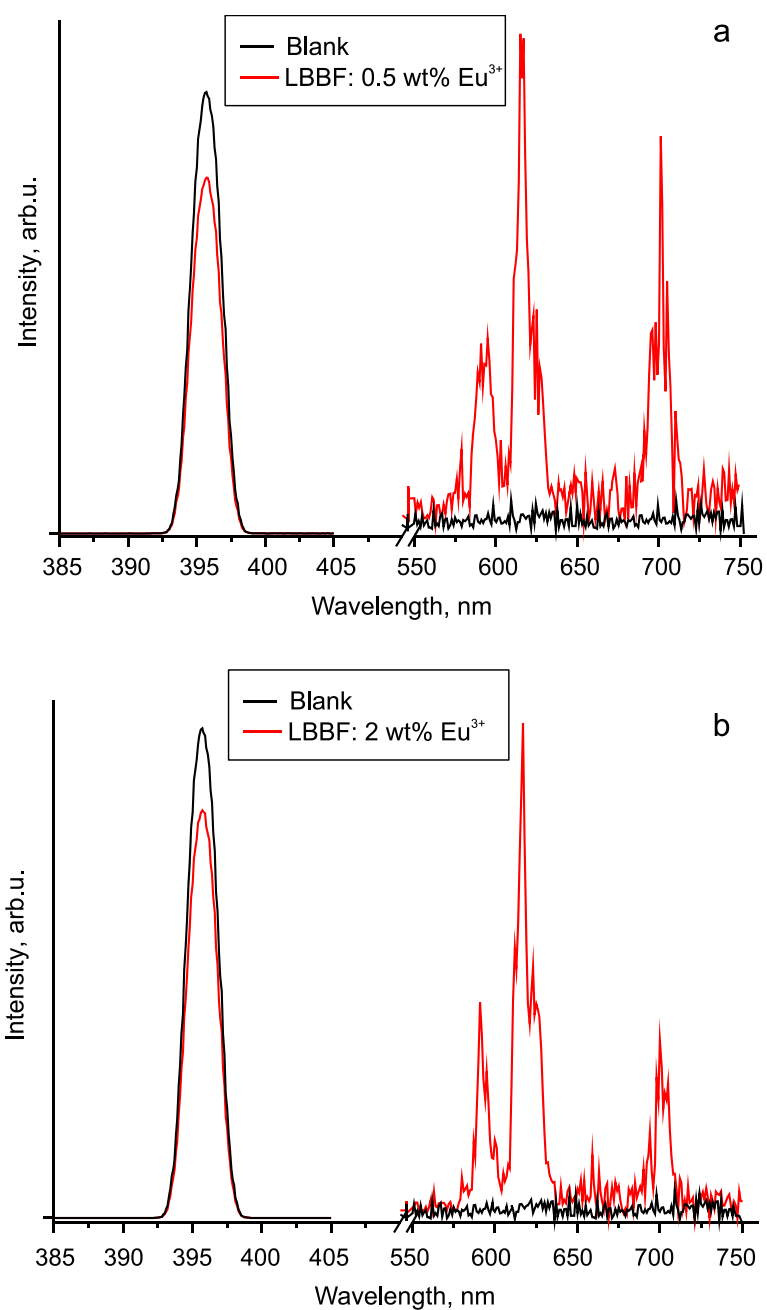

**Fig. S5** Excitation light profiles and PL spectra obtained under 395 nm excitation by setting quartz cells with and without the sample: LBBF: 0.5 wt% Eu<sup>3+</sup> (a), LBBF: 2 wt% Eu<sup>3+</sup> (b).
